# Supplementary material for: The Braincase of the Basal Sauropod Dinosaur Spinophorosaurus and 3D Reconstructions of the Cranial Endocast and Inner Ear
Source: PubMed Central journal article supplement (PMC3260197; doi:10.1371/journal.pone.0030060), 2012-01-17

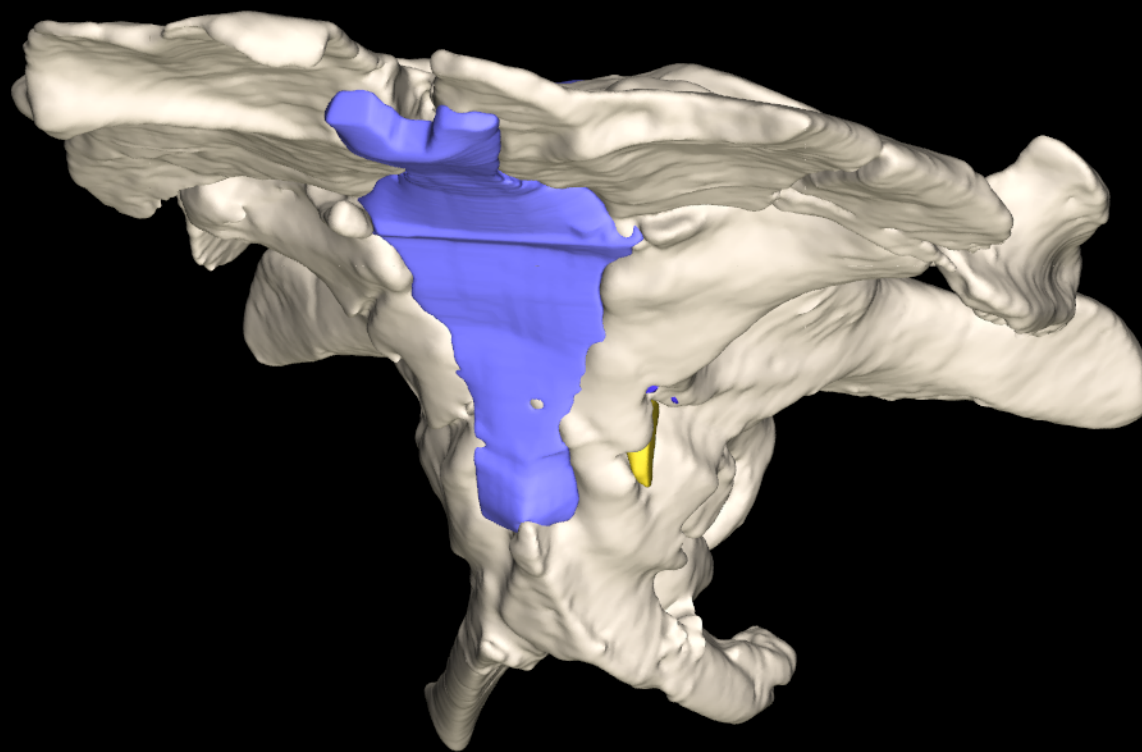

Supplement: pone.0030060.s002.pdf [file pone.0030060.s002.pdf]
